# Supplementary material for: High Frequency Electromagnetic Radiation Stimulates Neuronal Growth and Hippocampal Synaptic Transmission
Source: MDPI journal article supplement (doi:10.3390/brainsci13040686), 2023-04-19
Supplement: s1 [file s1]

Table S1 Growth of total length of neuronal protrusion and cell body area in the control group.

| Control  | Growth of NP ( px ) |        |        | Growth of CBA ( px <sup>2</sup> ) |        |        |
|----------|---------------------|--------|--------|-----------------------------------|--------|--------|
|          | 1 day               | 2 day  | 3 day  | 1 day                             | 2 day  | 3 day  |
| Sample 1 | 96.65               | 235.26 | 201.60 | 105.50                            | 258.75 | 4.50   |
| Sample 2 | 132.39              | 160.09 | 347.83 | 27.12                             | 79.75  | 160.50 |
| Sample 3 | 174.67              | 185.46 | 202.71 | 53.81                             | 103.75 | 62.62  |
| Sample 4 | 70.01               | 162.65 | 270.25 | 53.50                             | 95.75  | 162.83 |
| Sample 5 | 150.88              | 194.93 | 173.61 | 87.00                             | 169    | 84.75  |
| Sample 6 | 89.99               | 185.12 | 179.98 | 38.00                             | 100.83 | 99.00  |
| Sample 7 | 89.52               | 307.79 | 202.82 | 59.00                             | 116.50 | 53.00  |
| Sample 8 | 67.75               | 145.04 | 191.26 | 69.75                             | 23.25  | 23.50  |

\* Neuronal Protrusion (NP), Cell Body Area (CBA).

Table S2 Growth of total length of neuronal protrusion and cell body area in the THz group.

| THz      | Growth of NP ( px ) |         |         | Growth of CBA ( px <sup>2</sup> ) |        |        |
|----------|---------------------|---------|---------|-----------------------------------|--------|--------|
|          | 1 day               | 2 day   | 3 day   | 1 day                             | 2 day  | 3 day  |
| Sample 1 | 101.75              | 1247.70 | 2119.90 | 241.00                            | 425.00 | 562.00 |
| Sample 2 | 382.59              | 1226.15 | 1137.86 | 381.83                            | 417.00 | 584.90 |
| Sample 3 | 269.11              | 517.31  | 519.57  | 65.00                             | 131.41 | 234.45 |
| Sample 4 | 107.97              | 296.69  | 288.27  | 51.06                             | 56.26  | 148.43 |
| Sample 5 | 205.06              | 359.37  | 537.43  | 82.75                             | 102.75 | 148.50 |
| Sample 6 | 80.29               | 280.59  | 279.60  | 113.00                            | 212.00 | 108.75 |
| Sample 7 | 78.47               | 343.32  | 409.23  | 42.00                             | 63.50  | 109.33 |
| Sample 8 | 99.00               | 162.31  | 436.73  | 47.75                             | 157.00 | 168.75 |

\* Neuronal Protrusion (NP), Cell Body Area (CBA).

Table S3 Statistical description of terahertz radiation promoted neuronal growth.

|             |            | Growth of CBA ( $px^2$ ) |        |       |        | Growth of NP ( $px$ ) |        |        |        |
|-------------|------------|--------------------------|--------|-------|--------|-----------------------|--------|--------|--------|
|             |            | ND                       | Mean   | SEM   | Median | ND                    | Mean   | SEM    | Median |
| <b>1day</b> | <b>CON</b> | Yes                      | 61.71  | 8.89  | 56.40  | Yes                   | 108.98 | 13.84  | 93.32  |
|             | <b>THz</b> | Yes                      | 128.04 | 42.92 | 73.87  | Yes                   | 165.53 | 39.20  | 104.86 |
| <b>2day</b> | <b>CON</b> | Yes                      | 118.44 | 24.58 | 102.29 | Yes                   | 197.04 | 18.54  | 185.29 |
|             | <b>THz</b> | Yes                      | 195.61 | 52.27 | 144.20 | Yes                   | 554.18 | 153.00 | 351.34 |
| <b>3day</b> | <b>CON</b> | Yes                      | 81.33  | 20.54 | 73.68  | Yes                   | 221.25 | 20.85  | 202.15 |
|             | <b>THz</b> | Yes                      | 258.13 | 70.22 | 158.62 | Yes                   | 716.07 | 628.47 | 478.15 |

\* Neuronal Protrusion (NP), Cell Body Area (CBA), Normal Distribution (ND), Standard Error of Mean (SEM).

Table S4 T-test statistics of terahertz radiation promoted neuronal growth.

|             |  | Growth of CBA ( $px^2$ ) |       |    |         | Growth of NP ( $px$ ) |       |    |         |
|-------------|--|--------------------------|-------|----|---------|-----------------------|-------|----|---------|
|             |  | N                        | t     | DF | P       | N                     | t     | DF | P       |
| <b>1day</b> |  | 8                        | -1.51 | 14 | 0.15262 | 8                     | -1.36 | 14 | 0.19527 |
| <b>2day</b> |  | 8                        | -1.35 | 14 | 0.20289 | 8                     | -2.31 | 14 | 0.03615 |
| <b>3day</b> |  | 8                        | -2.41 | 14 | 0.02992 | 8                     | -2.21 | 14 | 0.04367 |

N=8 indicates that there are 8 pairs of data (THz=8, CON=8), P<0.05 indicates significant difference.

Table S5 Slope and amplitude of postsynaptic potentials in hippocampal CA1 region before and after terahertz radiation.

| Sample   | Slope ( <i>a.u.</i> ) |       |       | Amplitude ( <i>mV</i> ) |        |         |
|----------|-----------------------|-------|-------|-------------------------|--------|---------|
|          | BL                    | THz-A | THz-C | BL                      | THz-A  | THz-C   |
| Sample 1 | 4.87                  | 5.53  | 9.43  | 816.60                  | 844.10 | 916.28  |
| Sample 2 | 3.59                  | 3.83  | 6.59  | 399.10                  | 445.83 | 767.77  |
| Sample 3 | 3.40                  | 4.24  | 9.27  | 275.82                  | 284.13 | 487.23  |
| Sample 4 | 1.79                  | 1.97  | 3.58  | 263.78                  | 314.71 | 722.21  |
| Sample 5 | 9.65                  | 9.90  | 11.00 | 210.84                  | 211.20 | 424.45  |
| Sample 6 | 5.55                  | 7.81  | 18.49 | 604.65                  | 790.55 | 2579.73 |
| Sample 7 | 4.08                  | 5.63  | 14.09 | 387.57                  | 514.40 | 1121.30 |
| Sample 8 | 1.89                  | 2.42  | 4.08  | 203.73                  | 235.10 | 459.32  |

\* BaseLine (BL), Terahertz radiation 0-5min (THz-A), Terahertz radiation 55-60min (THz-C).

Table S6 Statistical description of slope and amplitude of postsynaptic potentials in hippocampal CA1 region before and after terahertz radiation.

|       | Slope ( <i>a.u.</i> ) |      |      |        | Amplitude ( <i>mV</i> ) |        |        |        |
|-------|-----------------------|------|------|--------|-------------------------|--------|--------|--------|
|       | ND                    | Mean | SEM  | Median | ND                      | Mean   | SEM    | Median |
| BL    | Yes                   | 4.35 | 0.88 | 3.83   | Yes                     | 395.26 | 76.02  | 331.70 |
| THz-A | Yes                   | 5.17 | 0.94 | 4.89   | Yes                     | 455.00 | 87.04  | 380.27 |
| THz-C | Yes                   | 9.57 | 1.77 | 9.35   | Yes                     | 934.79 | 250.03 | 744.99 |

\* Normal Distribution (ND), Standard Error of Mean (SEM).

Table S7 Paired T-test statistics of slope and amplitude of postsynaptic potentials in hippocampal CA1 region before and after terahertz radiation.

|                | Slope ( <i>a.u.</i> ) |       |    |         | Amplitude ( <i>mV</i> ) |       |    |         |
|----------------|-----------------------|-------|----|---------|-------------------------|-------|----|---------|
|                | N                     | t     | DF | P       | N                       | t     | DF | P       |
| BL vs THz-A    | 8                     | -3.12 | 7  | 0.01676 | 8                       | -2.63 | 7  | 0.03300 |
| BL vs THz-C    | 8                     | -3.49 | 7  | 0.00999 | 8                       | -2.45 | 7  | 0.04382 |
| THz-A vs THz-C | 8                     | -3.56 | 7  | 0.00918 | 8                       | -2.49 | 7  | 0.04140 |

\*N=8 indicates that there are 8 pairs of data (BL=8, THz-A=8, THz-C=8), P<0.05 indicates significant difference.

Table S8 Slope and amplitude of postsynaptic potentials in the CA1 region of the hippocampus after cessation of terahertz radiation.

| Sample          | Slope ( <i>a. u.</i> ) |         |         | Amplitude ( <i>mV</i> ) |         |         |
|-----------------|------------------------|---------|---------|-------------------------|---------|---------|
|                 | BL                     | THzEndA | THzEndB | BL                      | THzEndA | THzEndB |
| <b>Sample 1</b> | 5.16                   | 9.96    | 9.80    | 405.56                  | 792.71  | 783.72  |
| <b>Sample 2</b> | 3.59                   | 6.62    | 6.43    | 275.82                  | 492.53  | 481.35  |
| <b>Sample 3</b> | 3.40                   | 9.51    | 9.21    | 263.78                  | 715.33  | 700.84  |
| <b>Sample 4</b> | 12.36                  | 32.43   | 30.94   | 1016.87                 | 2685.77 | 2596.32 |
| <b>Sample 5</b> | 4.08                   | 13.91   | 13.57   | 387.57                  | 1109.38 | 1099.18 |
| <b>Sample 6</b> | 1.89                   | 4.35    | 4.31    | 203.73                  | 441.92  | 478.49  |
| <b>Sample 7</b> | 5.55                   | 22.12   | 22.31   | 604.65                  | 2610.78 | 2592.39 |
| <b>Sample 8</b> | 1.79                   | 3.44    | 3.43    | 210.84                  | 428.00  | 409.39  |

\* BaseLine (BL), Terahertz radiation end 0-5min (THzEndA), Terahertz radiation end 5-10min (THzEndB).

Table S9 Statistical description of slope and amplitude of postsynaptic potentials in the CA1 region of the hippocampus after cessation of terahertz radiation.

|                | Slope ( <i>a. u.</i> ) |       |      |        | Amplitude ( <i>mV</i> ) |         |        |        |
|----------------|------------------------|-------|------|--------|-------------------------|---------|--------|--------|
|                | ND                     | Mean  | SEM  | Median | ND                      | Mean    | SEM    | Median |
| <b>BL</b>      | Yes                    | 4.73  | 1.18 | 3.83   | Yes                     | 421.10  | 97.03  | 331.70 |
| <b>THzEndA</b> | Yes                    | 12.79 | 3.50 | 9.74   | Yes                     | 1159.55 | 334.47 | 754.02 |
| <b>THzEndB</b> | Yes                    | 12.50 | 3.38 | 9.51   | Yes                     | 1142.71 | 326.14 | 742.28 |

\* Normal Distribution (ND), Standard Error of Mean (SEM).

Table S10 Paired T-test statistics of slope and amplitude of postsynaptic potentials in the CA1 region of the hippocampus after cessation of terahertz radiation.

|                           | Slope ( <i>a. u.</i> ) |       |    |         | Amplitude ( <i>mV</i> ) |       |    |         |
|---------------------------|------------------------|-------|----|---------|-------------------------|-------|----|---------|
|                           | N                      | t     | DF | P       | N                       | t     | DF | P       |
| <b>BL vs THzEndA</b>      | 8                      | -3.31 | 7  | 0.01290 | 8                       | -2.96 | 7  | 0.02095 |
| <b>BL vs THzEndB</b>      | 8                      | -3.33 | 7  | 0.01256 | 8                       | -2.98 | 7  | 0.02044 |
| <b>THzEndA vs THzEndB</b> | 8                      | 1.60  | 7  | 0.15277 | 8                       | 1.38  | 7  | 0.20845 |

\*N=8 indicates that there are 8 pairs of data (BL=8, THzEndA=8, THzEndB=8), P<0.05 indicates significant difference.

Table S11 Dendritic spine density in the terahertz and control groups.

| Sample    | Density of dendritic spines in M1 region ( <i>ind/um</i> ) |       | Density of dendritic spines in M2 region ( <i>ind/um</i> ) |       |
|-----------|------------------------------------------------------------|-------|------------------------------------------------------------|-------|
|           | CON                                                        | THz   | CON                                                        | THz   |
| Sample 1  | 0.673                                                      | 0.855 | 0.696                                                      | 0.768 |
| Sample 2  | 0.686                                                      | 0.862 | 0.700                                                      | 0.784 |
| Sample 3  | 0.755                                                      | 0.867 | 0.746                                                      | 0.827 |
| Sample 4  | 0.771                                                      | 0.875 | 0.755                                                      | 0.845 |
| Sample 5  | 0.776                                                      | 0.878 | 0.756                                                      | 0.883 |
| Sample 6  | 0.783                                                      | 0.885 | 0.773                                                      | 0.888 |
| Sample 7  | 0.815                                                      | 0.889 | 0.783                                                      | 0.899 |
| Sample 8  | 0.816                                                      | 0.894 | 0.787                                                      | 0.932 |
| Sample 9  | 0.819                                                      | 0.916 | 0.790                                                      | 0.962 |
| Sample 10 | 0.822                                                      | 0.916 | 0.795                                                      | 0.974 |

\* Control (CON), Terahertz radiation (THz).

Table S12 Statistical description of Dendritic spine density in the terahertz and control groups

|     | Density of dendritic spines in M1 region ( <i>ind/um</i> ) |      |       |        | Density of dendritic spines in M2 region ( <i>ind/um</i> ) |      |       |        |
|-----|------------------------------------------------------------|------|-------|--------|------------------------------------------------------------|------|-------|--------|
|     | ND                                                         | Mean | SEM   | Median | ND                                                         | Mean | SEM   | Median |
| CON | Yes                                                        | 0.77 | 0.01  | 0.78   | Yes                                                        | 0.75 | 0.01  | 0.76   |
| THz | Yes                                                        | 0.88 | 0.006 | 0.88   | Yes                                                        | 0.87 | 0.022 | 0.88   |

\* Normal Distribution (ND), Standard Error of Mean (SEM).

Table S13 T-test statistics of Dendritic spine density in the terahertz and control groups

|            | Density of dendritic spines in M1 region ( <i>ind/um</i> ) |       |    |           | Density of dendritic spines in M2 region ( <i>ind/um</i> ) |       |    |            |
|------------|------------------------------------------------------------|-------|----|-----------|------------------------------------------------------------|-------|----|------------|
|            | N                                                          | t     | DF | P         | N                                                          | t     | DF | P          |
| CON vs THz | 10                                                         | -6.13 | 18 | 8.5098E-6 | 10                                                         | -4.74 | 18 | 1.60671E-4 |

\*N=10 indicates that there are 8 pairs of data (CON=10, THz=10), P<0.05 indicates significant difference.
